# Supplementary material for: Physiological specialization of common bunt of wheat (Tilletia levis (Kuhn) and Tilletia tritici (Bjerk.) Wint.) in Bulgaria.
Source: PeerJ journal article supplement (doi:10.7717/peerj.8967), 1974-01-01
Supplement: DATA_FGS-RTxIMG_PeerJ.xlsx [file DATA_FGS-RTxIMG_PeerJ.xlsx]

## Sheet: Demographics
Cat #	Treatment	BCS	Weight	Hematocrit %	Total Protein g/dL	Other comments
1	BUPI-DEX*	5	3.17*	38	78	EXCLUDED - FGS
2	BUPI	4	3.7	36	74
3	BUPI-DEX	5	3.69	38	76
4	BUPI	6	4.2	28	66
5	BUPI-DEX*	6	3.89*	40	82	EXCLUDED - FGS
6	BUPI*	4	3.11*	37.5	76
7	BUPI	3	1.88	28	60
8	BUPI	4	2.4	29	58
9	BUPI*	5	2.7*	38	68	EXCLUDED - FGS
10	BUPI-DEX	3	2.5	39	74
11	BUPI-DEX	4	3.11	42	74
12	BUPI-DEX	4	2.78	36	63
13	BUPI	4	3	39	82
13B	-	5
14	BUPI-DEX	3	2.85	35	71
15	BUPI*	5	3.5*	36	74	EXCLUDED - FGS
16	BUPI-DEX	4	2.8	28	63
17	BUPI-DEX	4	2.65	29	67
18	BUPI	5	4.14	31	70
19	BUPI-DEX*	6	4*	37	69	EXCLUDED - FGS
20	BUPI	4	2.4	27	60
21	BUPI	4	2.2	27	82
22	BUPI	5	2.9	35	62
23	BUPI-DEX	5	3.85
24	BUPI	4	2.4	34	72
25	BUPI-DEX*	4	2.65*	32	60	EXCLUDED - FGS
26	BUPI*	4	2.25*	36	64	EXCLUDED - FGS
27	BUPI-DEX	4	2.16	38	65
28	BUPI-DEX	5	2.85	35	67
29	BUPI	5	1.68	31	66
30	BUPI-DEX	5	2.04	24	60
31	BUPI-DEX	5	2.96	24	85
32	BUPI-DEX	5	3	29	68
33	BUPI	6	3.26	27	67
34	BUPI		3	33	74
35	BUPI	4	2.25	42	76
36	BUPI-DEX	4	1.54	30	59
37	BUPI-DEX	4	1.39	32	71
38	BUPI*	5	3.06*	38	72	EXCLUDED - FGS
39	BUPI-DEX	4	1.81	28	62
40	BUPI	5	1.85	30	57
41	BUPI-DEX	4	1.79	33	75
42	BUPI-DEX	5	5.75	29	65
43	BUPI	3	2.75	28	64
44	BUPI-DEX*	2	0.9*			EXCLUDED - FGS
45	BUPI	4	2.98	24	61
46	BUPI-DEX	5	3	34	60
47	BUPI*	4	2.64*			EXCLUDED - FGS
48	BUPI-DEX	5	3.3	36	62
49	BUPI	5	3.88	35	60
50	BUPI	5	3.01	37	62
51	BUPI	5	3.47	41	76
52	BUPI*	4	2.52*			EXCLUDED - FGS
53	BUPI-DEX	3	2.97*	29	67
54	BUPI-DEX	3	3.1	28	74
55	BUPI	5	3.4	40	76
56	BUPI-DEX	4	3.78	40	70
57	BUPI-DEX	4	3.6	38	59
58	BUPI	5	3.17	38	66
59	BUPI	5	3.04	31	70
60	BUPI-DEX*	9	6.84*			EXCLUDED - FGS
61	BUPI-DEX	3	2.8	35	67
62	BUPI-DEX	5	2.8	31	60
63	BUPI-DEX	5	3.4	32	68
64	BUPI	4	3.63	33	68
65	BUPI-DEX	3	3.5	31	58
66	BUPI-DEX	4	3.3	31	66
67	BUPI-DEX	5	2.7	30	64
68	BUPI	3	3	28	69
69	BUPI-DEX	4	1.69	32	66
70	BUPI-DEX	4	1.76	30	56
71	BUPI-DEX	4	2.1	35	68
72	BUPI-DEX	4	2.77	35	60
73	BUPI	4	3	32	62
74	BUPI*	3	1.63*	31	70	EXCLUDED - FGS
75	BUPI-DEX*	5	3.5*	16	79.9	EXCLUDED - FGS
76	BUPI*	4	1.92*	33	64	EXCLUDED - FGS
77	BUPI-DEX	3	2	35	55
78	BUPI	4	2.3	32	73
79	BUPI-DEX	5	3.12	37	70
80	BUPI	5	2.98	35	74

## Sheet: Scores FGS RT
	CAT #	Time point	FGS RT 1'	FGS RT 2'	FGS RT 3'	Final score FGS RT
	2	Baseline	0	0	0	0
	2	15 min	0.1	0.1	0	0.0666667
Rescue	2	1h	0.5	0.5	0.5	0.5
1h after	2	2 h	0.6	0.7	0.7	0.666667
	2	6 h	0.125	0.25	0.25	0.208333
	2	12 h	0.2	-	0.2	0.2
	2	24 h	-	0.2	-	0.2
	3	Baseline	0.3	0.3	-	0.3
	3	15 min	0.5	0.5	0.4	0.466667
	3	2 h	0.4	0.5	0.3	0.4
	3	6 h	0.3	0.6	0.5	0.466667
	3	12 h	0.3	0.2	0.2	0.233333
	3	24 h	-	-	0.2	0.2
	4	Baseline	-	0	0	0
	4	15 min	0.25	0.25	0.25	0.25
Rescue	4	1h	0.4	0.5	0.5	0.466667
1h after	4	2 h	0.1	0.1	0.1	0.1
	4	6 h	0.3	-	-	0.3
	4	12 h	0	0	0.1	0.0333333
	4	24 h	0.1	0.1	0.1	0.1
	7	Baseline	0	0	0	0
	7	15 min	0	0	0.1	0.0333333
	7	2 h	0.3	0.3	0.25	0.283333
	7	6 h	0	0.2	0	0.0666667
	7	12 h	-	0.1	0	0.05
	7	24 h	0	0	0	0
	8	Baseline	0.2	0	0	0.0666667
	8	15 min	0.3	0.4	0.3	0.333333
	8	2 h	0.3	0.3	0.4	0.333333
	8	6 h	0.2	0	0	0.0666667
	8	12 h	0.3	0.3	0.3	0.3
	8	24 h	0.1	0.3	0.3	0.233333
	10	Baseline	0.2	0.2	0.1	0.166667
	10	15 min	0.1	0.1	0	0.0666667
	10	2 h	0.3	0.4	0.5	0.4
	10	6 h	0.3	-	0.4	0.35
	10	12 h	0	0.2	0.1	0.1
	10	24 h	0.1	0.2	0.1	0.133333
	11	Baseline	0.3	0.2	0.3	0.266667
	11	15 min	0	0	0	0
	11	2 h	0.6	0.6	0.6	0.6
	11	6 h	0.3	0.5	0.5	0.433333
	11	12 h	0.2	0	0.125	0.108333
	11	24 h	0	0.2	0.1	0.1
	12	Baseline	0.2	0.3	0.3	0.266667
	12	15 min	0.3	0.375	0.2	0.291667
	12	2 h	0.3	0.375	0.2	0.291667
	12	6 h	0.1	0.2	0.2	0.166667
	12	12 h	0.2	0.2	0.3	0.233333
	12	24 h	-	0.3	0.3	0.3
	13	Baseline	0.1	0.1	0.2	0.133333
	13	15 min	0.2	0.2	0.3	0.233333
	13	2 h	0.3	0.125	0.2	0.208333
	13	6 h	-	0.2	0.1	0.15
	13	12 h	0.1	0.1	0.1	0.1
	13	24 h	0.2	0.2	0	0.133333
	14	Baseline	0.375	0.5	0.125	0.333333
	14	15 min	0.25	0.375	0.375	0.333333
	14	2 h	-	-	-	-
	14	6 h	-	-	-	-
	14	12 h	-	-	-	-
	14	24 h	-	-	-	-
	16	Baseline	0	0	0	0
	16	15 min	0.1	0.3	0.2	0.2
	16	2 h	0.3	0.5	0.2	0.333333
	16	6 h	0.2	0.3	0.4	0.3
Rescue	16	8 h	0.3	0.4	0.4	0.366667
1h after	16	9h	0.3	0.4	0.4	0.366667
	16	12 h	0	0	0.1	0.0333333
	16	24 h	0	0	0	0
	17	Baseline	-	0	-	0
	17	15 min	0	0	0	0
	17	2 h	0	0	0	0
	17	6 h	-	0	0	0
	17	12 h	0	0.1	0.2	0.1
	17	24 h	0	0.1	0	0.0333333
	18	Baseline	0	0.1	0	0.0333333
	18	15 min	0.3	0.3	0.2	0.266667
	18	2 h	0.2	0.2	0	0.133333
	18	6 h	0	0.1	0	0.0333333
	18	12 h	0.3	0.3	0.3	0.3
	18	24 h	0	-	-	0
	20	Baseline	0.1	0.3	0.3	0.233333
	20	15 min	0.2	0.1	0.2	0.166667
	20	2 h	0.4	0.4	0.5	0.433333
Rescue	20	4 h	0.9	0.9	0.8	0.866667
1h after	20	5 h	0.4	0.5	0.5	0.466667
	20	6 h	0.2	0.3	0.4	0.3
	20	12 h	0.4	0.1	0.1	0.2
	20	24 h	0.2	0.2	0.2	0.2
	21	Baseline	0.3	0.3	0.3	0.3
	21	15 min	-	0.2	0.2	0.2
	21	2 h	0.5	0.4	0.4	0.433333
	21	6 h	-	0.3	0.4	0.35
	21	12 h	0.1	0.3	0.1	0.166667
	21	24 h	-	-	-	-
	22	Baseline	-	0.1	0.2	0.15
	22	15 min	0.3	0.5	0.4	0.4
	22	2 h	0.375	0.5	0.5	0.458333
	22	6 h	-	-	-	-
	22	12 h	0.3	0.3	0.3	0.3
	22	24 h	0.2	0.2	0.1	0.166667
	23	Baseline	-	0.2	0.2	0.2
	23	15 min	0.4	0.4	0.4	0.4
	23	2 h	-	-	-	-
	23	6 h	-	-	-	-
	23	12 h	-	-	-	-
	23	24 h	-	-	-	-
	24	Baseline	0.3	0.5	0.6	0.466667
	24	15 min	0.5	0.5	0.5	0.5
	24	2 h	0.6	0.6	0.6	0.6
	24	6 h	-	-	-	-
	24	12 h	0.4	0.5	0.5	0.466667
	24	24 h	0	0.1	0.1	0.0666667
	27	Baseline	0.1	0.1	0.3	0.166667
	27	15 min	0.5	0.4	0.3	0.4
	27	2 h	0	0	0.1	0.0333333
	27	6 h	0.2	0.2	0.3	0.233333
	27	12 h	0	0	0.1	0.0333333
	27	24 h	0.1	0	0	0.0333333
	28	Baseline	0	0.1	0.1	0.0666667
	28	15 min	0	0	0	0
	28	2 h	0.2	0	0.1	0.1
	28	6 h	0	0	0.1	0.0333333
	28	12 h	0	0	0.2	0.0666667
	28	24 h	0.1	0.2	0	0.1
	29	Baseline	0.1	-	-	0.1
	29	15 min	-	0.1	0.1	0.1
	29	2 h	0	0.2	0	0.0666667
	29	6 h	0	0.2	0	0.0666667
	29	12 h	0.2	0	0	0.0666667
	29	24 h	0.2	0	0	0.0666667
	30	Baseline	-	0.3	0.3	0.3
	30	15 min	0.3	0.2	0.2	0.233333
	30	2 h	0.5	0.4	0.2	0.366667
	30	6 h	0	0.2	-	0.1
	30	12 h	0.2	0.1	0.1	0.133333
	30	24 h	0.1	0	0.1	0.0666667
	31	Baseline	0.4	0.4	0.4	0.4
	31	15 min	0.4	0.4	0.5	0.433333
	31	2 h	0.5	0.5	0.5	0.5
	31	6 h	0.2	0.2	0.3	0.233333
	31	12 h	0.2	0.4	0.4	0.333333
	31	24 h	0.3	0.4	0.3	0.333333
	32	Baseline	0.3	0.3	0.375	0.325
	32	15 min	-	0	0	0
	32	2 h	0.1	0	0.2	0.1
	32	6 h	0.166667	-	-	0.166667
	32	12 h	0.1	0.1	0.1	0.1
	32	24 h	0.166667	0.3	0.25	0.238889
	33	Baseline	-	-	0.3	0.3
	33	15 min	-	0.2	0.1	0.15
	33	2 h	0	0.2	0.3	0.166667
Rescue	33	3 h	0.4	0.5	0.2	0.366667
1h after	33	4 h	0	0	0	0
	33	6 h	-	0	-	0
	33	12 h	0.1	0.4	0.2	0.233333
	33	24 h	-	0.2	0	0.1
	34	Baseline	0.2	0.3	0	0.166667
	34	15 min	0.3	0.4	0.4	0.366667
	34	2 h	-	0.3	0.3	0.3
	34	6 h	0.3	0.3	-	0.3
	34	12 h	0.2	-	0.2	0.2
	34	24 h	0.166667	0	0	0.0555556
	35	Baseline	0.3	0	0.2	0.166667
	35	15 min	0	0.2	0	0.0666667
	35	2 h	0.2	0	0.3	0.166667
	35	6 h	0	0.3	0.25	0.183333
	35	12 h	0.4	0.4	0.2	0.333333
	35	24 h	0.1	0	0.3	0.133333
	36	Baseline	0.3	0.2	0.3	0.266667
	36	15 min	0.3	0.3	0.3	0.3
	36	2 h	0.2	0.2	0.2	0.2
	36	6 h	0.1	0.2	0.2	0.166667
	36	12 h	0.3	0.2	0.2	0.233333
	36	24 h	-	0.3	0.3	0.3
	37	Baseline	0	0	0	0
	37	15 min	0	0.2	0.2	0.133333
	37	2 h	0	0	0.1	0.0333333
	37	6 h	0	0	0.1	0.0333333
	37	12 h	0.2	0.1	0.1	0.133333
	37	24 h	0.2	0.2	-	0.2
	39	Baseline	0	0	0	0
	39	15 min	0	0	0	0
	39	2 h	0.3	0.4	0.5	0.4
	39	6 h	0.2	0	0.1	0.1
	39	12 h	0.4	-	-	0.4
	39	24 h	0	0	0.2	0.0666667
	40	Baseline	0.1	0.1	0	0.0666667
	40	15 min	0.3	0.3	0.3	0.3
	40	2 h	0.4	0.4	0.4	0.4
	40	6 h	0.3	0.1	0.2	0.2
	40	12 h	0.2	0.2	0.1	0.166667
	40	24 h	0.2	0.1	0.1	0.133333
	41	Baseline	0.2	0.2	0.1	0.166667
	41	15 min	0.4	0.2	0.2	0.266667
	41	2 h	0.3	0.5	0.5	0.433333
	41	6 h	-	-	-	-
	41	12 h	0.5	0.5	0.4	0.466667
	41	24 h	0.2	0.5	0.5	0.4
	42	Baseline	0	0.1	0.1	0.0666667
	42	15 min	0.1	0	0	0.0333333
Rescue	42	30 min	-	0.2	0.1	0.15
1h after	42	90 min	0	0	0	0
	42	2 h	0.1	0	0	0.0333333
	42	6 h	0	0	0	0
	42	12 h	0	0.2	0	0.0666667
	42	24 h	0.7	0.5	0.3	0.5
	43	Baseline	0	0	0	0
	43	15 min	0	0.1	0	0.0333333
	43	2 h	0.2	0.1	0.1	0.133333
Rescue	43	4 h	0.1	0.1	0.1	0.1
1h after	43	5 h	0	0.3	0.3	0.2
	43	6 h	0	0.2	0.2	0.133333
	43	12 h	0	0	0	0
	43	24 h	0.2	0.4	0.2	0.266667
	45	Baseline	0	0	0	0
	45	15 min	0.1	0.4	0.4	0.3
	45	2 h	0	0	0	0
	45	6 h	0	-	-	0
	45	12 h	0.2	0.2	0.2	0.2
	45	24 h	0.2	0.2	0.1	0.166667
	46	Baseline	0.1	0	-	0.05
	46	15 min	0.1	0	0	0.0333333
	46	2 h	0.1	0	0.1	0.0666667
	46	6 h	0	0	0.1	0.0333333
	46	12 h	0	0	0	0
	46	24 h	0.2	0	0	0.0666667
	48	Baseline	0.1	0	0.3	0.133333
	48	15 min	0	0.2	-	0.1
	48	2 h	0.4	0.4	0.5	0.433333
	48	6 h	0.4	0.5	0.6	0.5
Rescue	48	8 h	0.1	0.2	0.3	0.2
1h after	48	9 h	0.1	0.1	0.1	0.1
	48	12 h	0.3	0.5	0.3	0.366667
	48	24 h	0.3	0.3	0.3	0.3
	49	Baseline	0	0.1	0	0.0333333
	49	15 min	0	0	0	0
	49	2 h	0	0.2	0.3	0.166667
	49	6 h	0	0	0.2	0.0666667
	49	12 h	0.375	0.375	-	0.375
	49	24 h	0.2	0.3	0.125	0.208333
	50	Baseline	0.3	0.3	0.4	0.333333
	50	15 min	0.5	0.4	0.4	0.433333
	50	2 h	0.4	0.4	0.4	0.4
	50	6 h	0.3	0.3	0.4	0.333333
	50	12 h	0.2	0.3	0.3	0.266667
	50	24 h	0.3	0.166667	0.4	0.288889
	51	Baseline	0.2	0.3	0.4	0.3
	51	15 min	0.3	0.3	0.3	0.3
	51	2 h	0.3	0.1	0.3	0.233333
	51	6 h	0.4	0.4	0.2	0.333333
	51	12 h	0.5	0.5	0.5	0.5
	51	24 h	0.3	0.4	0.3	0.333333
	53	Baseline	0.2	0.1	0.2	0.166667
	53	15 min	0.3	0.5	0.5	0.433333
	53	2 h	0.9	0.9	0.6	0.8
	53	6 h	-	0.8	-	0.8
	53	12 h	0.5	0.3	0.3	0.366667
	53	24 h	0.4	0.3	0.4	0.366667
	55	Baseline	0	0	-	0
	55	15 min	0.3	0.5	0.5	0.433333
	55	2 h	0.3	0.2	0.3	0.266667
	55	6 h	-	0.3	0.2	0.25
	55	12 h	0.5	0.5	0.6	0.533333
	55	24 h	0.4	0.3	0.5	0.4
	56	Baseline	0	0.1	0.1	0.0666667
	56	15 min	0.2	0.2	0.2	0.2
	56	2 h	0.5	0.5	0.5	0.5
Rescue	56	6 h	0.5	0.5	0.5	0.5
1h after	56	7 h	0	0	0	0
	56	12 h	0.25	0.25	0.125	0.208333
	56	24 h	0	0	-	0
	59	Baseline	0.5	0.4	0.3	0.4
	59	15 min	0.2	0.5	0.4	0.366667
	59	2 h	0.2	0.3	0.1	0.2
	59	6 h	0.5	0.4	0.2	0.366667
	59	12 h	0.375	-	0.4	0.3875
	59	24 h	0.4	0.3	-	0.35
	61	Baseline	-	0.3	0.3	0.3
	61	15 min	0.2	0.3	0.3	0.266667
Rescue	61	1 h	0.5	0.4	0.4	0.433333
1h after	61	2 h	0.3	0.4	0.3	0.333333
	61	6 h	0.2	0.1	0.2	0.166667
	61	12 h	0.1	0.1	0.3	0.166667
	61	24 h	0.1	0.1	0.3	0.166667
	62	Baseline	0.1	0.1	0.1	0.1
	62	15 min	0.1	0	0	0.0333333
	62	2 h	0.3	0.1	0.1	0.166667
	62	6 h	0	0.2	0.1	0.1
	62	12 h	0.2	0.2	0.3	0.233333
	62	24 h	0	0	0	0
	63	Baseline	0.1	0.1	0.1	0.1
	63	15 min	-	0.1	-	0.1
	63	2 h	0.3	0.2	0.1	0.2
	63	6 h	0.2	0.2	0.2	0.2
	63	12 h	0.125	0.25	0.2	0.191667
	63	24 h	-	0.2	0.2	0.2
	65	Baseline	0.1	0.2	0.3	0.2
	65	15 min	0.1	0.1	0.1	0.1
	65	2 h	0.2	0.3	0.3	0.266667
	65	6 h	0.3	0.5	0.5	0.433333
	65	12 h	0.1	0.1	0.3	0.166667
	65	24 h	0.4	0.2	0.2	0.266667
	66	Baseline	0.1	0	0.1	0.0666667
	66	15 min	0	0	0	0
	66	2 h	0.3	0.4	0.5	0.4
	66	6 h	0.3	0.3	0.3	0.3
	66	12 h	0.4	0.4	0.4	0.4
	66	24 h	0.3	0.4	0.4	0.366667
	67	Baseline	0	0	0	0
	67	15 min	0	0	0	0
	67	2 h	0	0	0	0
	67	6 h	0.1	0.1	0.1	0.1
	67	12 h	0.2	0	0	0.0666667
	67	24 h	0.1	0.2	-	0.15
	68	Baseline	0	0	0	0
	68	15 min	0	0	0	0
	68	2 h	0.1	0	0	0.0333333
	68	6 h	0.1	0	0.1	0.0666667
	68	12 h	0.2	0.4	0.5	0.366667
	68	24 h	0.2	0	0	0.0666667
	69	Baseline	-	0.2	0.1	0.15
	69	15 min	0.3	0.1	0.3	0.233333
	69	2 h	0.5	0.1	0.1	0.233333
	69	6 h	0.666667	-	0.5	0.583333
	69	12 h	0	0	0	0
	69	24 h	0	0	0	0
	72	Baseline	0.2	0.3	0.2	0.233333
	72	15 min	0.2	0.1	0.2	0.166667
	72	2 h	0.4	0.3	0.4	0.366667
	72	6 h	0.1	0.1	0.2	0.133333
	72	12 h	-	-	-	-
	72	24 h	0.2	0	0.1	0.1
	77	Baseline	0	0.1	-	0.05
	77	15 min	0.2	0	0.1	0.1
	77	2 h	0.4	0.4	0.4	0.4
	77	6 h	0.2	0.4	0.4	0.333333
	77	12 h	0.2	0.2	0.2	0.2
	77	24 h	0.1	0.1	0.2	0.133333
	78	Baseline	0.3	0.3	0.3	0.3
	78	15 min	0.1	0.2	0.2	0.166667
	78	2 h	0.25	0.375	0.5	0.375
	78	6 h	0.3	0.2	0.2	0.233333
	78	12 h	0.3	0.2	0.3	0.266667
	78	24 h	0.1	0.3	0.3	0.233333
	79	Baseline	-	0.3	0.2	0.25
	79	15 min	0.1	0	0	0.0333333
	79	2 h	0.1	0.2	0.4	0.233333
	79	6 h	0.1	0.3	-	0.2
	79	12 h	0	0	0	0
	79	24 h	0.1	0	0.1	0.0666667
	80	Baseline	0.4	0.1	-	0.25
	80	15 min	0.2	0.1	0.4	0.233333
Rescue	80	2 h	0.6	0.7	0.8	0.7
1h after	80	3 h	0.1	0.2	0.1	0.133333
	80	6 h	0.1	0.2	0.2	0.166667
	80	12 h	0.4	0.4	0.375	0.391667
	80	24 h	0.4	0.3	0.3	0.333333

## Sheet: Scores FGS IMG
	CAT #	Time point	FGS IMG 1'	FGS IMG 2'	FGS IMG 3'	Final score FGS IMG
	2	Baseline	-	0.1	-	0.1
	2	15 min		0	0.1	0.05
Rescue	2	1 h	0.4	-	-	0.4
1h after	2	2 h	0.6	0.7	0.6	0.633333
	2	6 h	-	-	-	-
	2	12 h	0.1	-	0.2	0.15
	2	24 h	0.2	0.2	0.1	0.166667
	3	Baseline	0	0.3	0.2	0.166667
	3	15 min	0.2	0.4	0.4	0.333333
	3	2 h	-	-	-	-
	3	6 h	0.3	0.5	0.3	0.366667
	3	12 h	0.4	-	-	0.4
	3	24 h	-	-	0.4	0.4
	4	Baseline	-	-	-	-
	4	15 min		-	-	-
Rescue	4	1 h	0.2	-	-	0.2
1h after	4	2 h	-	-	-	-
	4	6 h	-	-	-	-
	4	12 h	-	0	-	0
	4	24 h	-	-	-	-
	7	Baseline	-	-	-	-
	7	15 min	-	0.1	0.4	0.25
	7	2 h	0	-	-	0
	7	6 h	-	0	-	0
	7	12 h	-	-	-	-
	7	24 h	-	-	-	-
	8	Baseline	-	-	-	-
	8	15 min	-	-	-	-
	8	2 h	0.166667	0.5	0.25	0.305556
	8	6 h	0	-	-	0
	8	12 h	0	0.3	0.2	0.166667
	8	24 h	-	-	-	-
	10	Baseline	-	-	-	-
	10	15 min	0	0	0.3	0.1
	10	2 h	0.3	0.4	-	0.35
	10	6 h	0.1	-	0.3	0.2
	10	12 h	-	0.3	0.375	0.3375
	10	24 h	-	-	-	-
	11	Baseline	0	0	0	0
	11	15 min	0	0	0	0
	11	2 h	-	-	-	-
	11	6 h	-	0	0	0
	11	12 h	0	0	-	0
	11	24 h	0	0	0	0
	12	Baseline	0	-	-	0
	12	15 min	0.2	0	0	0.0666667
	12	2 h	-	0.1	-	0.1
	12	6 h	0.1	-	-	0.1
	12	12 h	-	0	-	0
	12	24 h	0.1	0	0	0.0333333
	13	Baseline	-	-	-	-
	13	15 min	-	-	-	-
	13	2 h	-	-	-	-
	13	6 h	-	-	0	0
	13	12 h	-	-	-	-
	13	24 h	-	-	-	-
	14	Baseline	0	-	-	0
	14	15 min	0	-	0.125	0.0625
	14	2 h	-	-	-	-
	14	6 h	-	-	-	-
	14	12 h	-	-	-	-
	14	24 h	-	-	-	-
	16	Baseline	-	0	-	0
	16	15 min	0	0.1	0	0.0333333
	16	2 h	0.3	0.5	0.2	0.333333
	16	6 h	0.3	0.3	0.3	0.3
Rescue	16	8 h	0.2	0.4	-	0.3
1h after	16	9 h	0.5	-	-	0.5
	16	12 h	0	-	0.1	0.05
	16	24 h	0.3	0.1	0	0.133333
	17	Baseline	0	-	-	0
	17	15 min	-	0	0	0
	17	2 h	-	-	-	-
	17	6 h	0.125	-	0.125	0.125
	17	12 h	-	-	-	-
	17	24 h	0	-	-	0
	18	Baseline	0	0	-	0
	18	15 min	-	-	-	-
	18	2 h	0	0.1	0	0.0333333
	18	6 h	-	-	-	-
	18	12 h	0	0.2	0.2	0.133333
	18	24 h	0.1	-	0.4	0.25
	20	Baseline	-	-	-	-
	20	15 min	0.3	0.2	0.3	0.266667
	20	2 h	0.6	0.5	0.5	0.533333
Rescue	20	4 h	0.4	0.6	0.8	0.6
1h after	20	5 h	0.1	0.4	0.6	0.366667
	20	6 h	0	0	0.3	0.1
	20	12 h	0	0	0	0
	20	24 h	0	0.1	-	0.05
	21	Baseline	-	-	0.1	0.1
	21	15 min	-	-	-	-
	21	2 h	0.3	0.5	0.4	0.4
	21	6 h	0.1	0	0.2	0.1
	21	12 h	-	-	0	0
	21	24 h	-	-	-	-
	22	Baseline	-	-	-	-
	22	15 min	0.4	0.4	0.5	0.433333
	22	2 h	-	-	-	-
	22	6 h	-	-	-	-
	22	12 h	0.3	0.4	0.4	0.366667
	22	24 h	-	0	0	0
	23	Baseline	-	0.1	0	0.05
	23	15 min	0.3	0.3	0	0.2
	23	2 h	-	-	-	-
	23	6 h	-	-	-	-
	23	12 h	-	-	-	-
	23	24 h	-	-	-	-
	24	Baseline	0.2	0.3	0.3	0.266667
	24	15 min	0.4	0.5	0.7	0.533333
	24	2 h	0.6	0.4	0.4	0.466667
	24	6 h	-	-	-	-
	24	12 h	0.4	0.2	0.4	0.333333
	24	24 h	0.125	-	0.3	0.2125
	27	Baseline	-	-	-	-
	27	15 min	-	-	-	-
	27	2 h	0	0.125	0.25	0.125
	27	6 h	0	0.125	0.5	0.208333
	27	12 h	0.25	0	0	0.0833333
	27	24 h	-	-	-	-
	28	Baseline	-	-	-	-
	28	15 min	0	-	0	0
	28	2 h	-	-	-	-
	28	6 h	0	0.1	0	0.0333333
	28	12 h	-	-	-	-
	28	24 h	-	-	-	-
	29	Baseline	-	-	-	-
	29	15 min	-	-	-	-
	29	2 h	-	-	-	-
	29	6 h	0	-	-	0
	29	12 h	-	-	-	-
	29	24 h	-	-	-	-
	30	Baseline	-	-	-	-
	30	15 min	-	-	-	-
	30	2 h	0	0.2	-	0.1
	30	6 h	-	0	-	0
	30	12 h	0.3	-	-	0.3
	30	24 h	0	-	-	0
	31	Baseline	0.3	0.3	0.3	0.3
	31	15 min	0.3	-	0.4	0.35
	31	2 h	0.2	0.5	0.6	0.433333
	31	6 h	0.4	0.4	0.3	0.366667
	31	12 h	0.1	0.2	0.3	0.2
	31	24 h	0.2	0.2	-	0.2
	32	Baseline	0	0.3	0.2	0.166667
	32	15 min	-	-	-	-
	32	2 h	-	-	-	-
	32	6 h	-	-	-	-
	32	12 h	-	-	-	-
	32	24 h	-	0	0	0
	33	Baseline	0.2	0		0.1
	33	15 min	-	0.2	0.2	0.2
	33	2 h	0.1	0.1	0.2	0.133333
Rescue	33	3 h	0.3	0.4	0.1	0.266667
1h after	33	4 h	0.1	0	0.1	0.0666667
	33	6 h	-	-	-	-
	33	12 h	0.1	0.2	-	0.15
	33	24 h	0.3	-	0.3	0.3
	34	Baseline	0.3	0.2	0	0.166667
	34	15 min	0.4	0.3	0.4	0.366667
	34	2 h	0	0	0.4	0.133333
	34	6 h	0.1	0.1	0.3	0.166667
	34	12 h	0		0.4	0.2
	34	24 h	0.1	0.125	0	0.075
	35	Baseline	-	-	-	-
	35	15 min	-	-	0	0
	35	2 h	0	-	-	0
	35	6 h	-	-	-	-
	35	12 h	-	-	-	-
	35	24 h	-	-	-	-
	36	Baseline	-	-	-	-
	36	15 min	-	-	-	-
	36	2 h	-	-	0.3	0.3
	36	6 h	-	-	-	-
	36	12 h	-	-	-	-
	36	24 h	-	-	-	-
	37	Baseline	-	0.3	-	0.3
	37	15 min	-	-	-	-
	37	2 h	0	0.5	0.1	0.2
	37	6 h	-	-	-	-
	37	12 h	0.4	0.3	0.1	0.266667
	37	24 h	-	0.3	-	0.3
	39	Baseline	-	-	-	-
	39	15 min	0.25	0.125	0.2	0.191667
	39	2 h	0.125	-	0.25	0.1875
	39	6 h	0.125	0	0	0.0416667
	39	12 h	0	0	-	0
	39	24 h	-	-	-	-
	40	Baseline	-	-	-	-
	40	15 min	-	-	-	-
	40	2 h	0.3	0.5	0.4	0.4
	40	6 h	0	0.2	0.1	0.1
	40	12 h	-	-	-	-
	40	24 h	-	-	-	-
	41	Baseline	0.2	0.1	0.5	0.266667
	41	15 min	0.3	0.4	0.3	0.333333
	41	2 h	-	-	-	-
	41	6 h	0.2	-	-	0.2
	41	12 h	-	-	-	-
	41	24 h	-	-	-	-
	42	Baseline	-	-	-	-
	42	15 min	0.1	0	0	0.0333333
Rescue	42	30 min	0.8	0.5	0.7	0.666667
1h after	42	90 min	0	0	0	0
	42	2 h	-	-	-	-
	42	6 h	-	-	-	-
	42	12 h	-	0.3	0	0.15
	42	24 h	0.6	0.6	0.6	0.6
	43	Baseline	-	-	-	-
	43	15 min	-	-	-	-
	43	2 h	0.375	-	-	0.375
Rescue	43	4 h	0.5	-	0.3	0.4
1h after	43	5 h	0	0.3	0	0.1
	43	6 h	0	0.1	0.2	0.1
	43	12 h	-	0.1	-	0.1
	43	24 h	0.1	-	0.3	0.2
	45	Baseline	-	0.3	-	0.3
	45	15 min	-	0.3	0.2	0.25
	45	2 h	-	-	-	-
	45	6 h	0.3	-	0.1	0.2
	45	12 h	-	0	0.3	0.15
	45	24 h	-	-	-	-
	46	Baseline	0	-	0	0
	46	15 min	0	0	0	0
	46	2 h	0	0	0	0
	46	6 h	0	0	0	0
	46	12 h	-	-	0	0
	46	24 h	0	-	-	0
	48	Baseline	-	-	-	-
	48	15 min	0	0.3	0.3	0.2
	48	2 h	0.3	-	-	0.3
	48	6 h	0	0.1	0.3	0.133333
Rescue	48	8 h	0.1	0.4	0	0.166667
1h after	48	9 h	0.1	-	0.2	0.15
	48	12 h	-	-	-	-
	48	24 h	0.1	0.2	-	0.15
	49	Baseline	-	0	-	0
	49	15 min	-	-	-	-
	49	2 h	0	0.2	0	0.0666667
	49	6 h	0.1	0	0	0.0333333
	49	12 h	-	-	0.1	0.1
	49	24 h	0	-	-	0
	50	Baseline	0	0.1	0.2	0.1
	50	15 min	0.4	0.3	0.3	0.333333
	50	2 h	-	0	-	0
	50	6 h	-	-	-	-
	50	12 h	-	-	-	-
	50	24 h	0	-	-	0
	51	Baseline	0.3	0.6	0.5	0.466667
	51	15 min	0.3	0.3	0.3	0.3
	51	2 h	-	-	-	-
	51	6 h	0.2	0.3	0.3	0.266667
	51	12 h	0.4	0.1	0.2	0.233333
	51	24 h	-	-	0.1	0.1
	53	Baseline	-	-	-	-
	53	15 min	-	-	-	-
	53	2 h	0.4	0.8	0.6	0.6
	53	6 h	-	-	-	-
	53	12 h	-	-	-	-
	53	24 h	-	-	-	-
	55	Baseline	-	-	-	-
	55	15 min	-	-	-	-
	55	2 h	0.1	0.1	0	0.0666667
	55	6 h	0.4	0.3	0.1	0.266667
	55	12 h	0.6	0.5	0.8	0.633333
	55	24 h	-	-	-	-
	56	Baseline	-	-	-	-
	56	15 min	0	0.1	0.1	0.0666667
	56	2 h	0.5	0.3	0.6	0.466667
Rescue	56	6 h	0.2	0.4	0.5	0.366667
1h after	56	7 h	0.2	0.2	0	0.133333
	56	12 h	-	-	-	-
	56	24 h	-	-	-	-
	59	Baseline	0.2	0	0	0.0666667
	59	15 min	0.2	0.2	0	0.133333
	59	2 h	0	0	0	0
	59	6 h	0.1	0.1	0.1	0.1
	59	12 h	-	-	0.2	0.2
	59	24 h	0.5	0	0.25	0.25
	61	Baseline	-	0.3	0.3	0.3
	61	15 min	-	-	-	-
Rescue	61	1 h	0.6	0.75	-	0.675
1h after	61	2 h	0.4	0.2	0.2	0.266667
	61	6 h	0	-	-	0
	61	12 h	-	-	0	0
	61	24 h	0.3	-	0.3	0.3
	62	Baseline	-	0.3	-	0.3
	62	15 min	-	0	-	0
	62	2 h	0.2	0	0.1	0.1
	62	6 h	0.1	-	-	0.1
	62	12 h	-	-	-	-
	62	24 h	-	-	0.1	0.1
	63	Baseline	-	-	-	-
	63	15 min	-	0.3	-	0.3
	63	2 h	-	-	-	-
	63	6 h	-	-	-	-
	63	12 h	-	-	-	-
	63	24 h	0.3	-	0.2	0.25
	65	Baseline	0.1	0.2	0.4	0.233333
	65	15 min	0	0	0	0
	65	2 h	0.2	0.2	0.2	0.2
	65	6 h	0.5	0.625	0.5	0.541667
	65	12 h	-	0.1	0.1	0.1
	65	24 h	0.5	0.2	0	0.233333
	66	Baseline	0.2	0.3	0	0.166667
	66	15 min	0.1	-	-	0.1
	66	2 h	0.1	-	-	0.1
	66	6 h	0	0.1	0	0.0333333
	66	12 h	0.3	0.2	0.4	0.3
	66	24 h	0.3	0.1	0	0.133333
	67	Baseline	-	-	-	-
	67	15 min	-	-	-	-
	67	2 h	0	0.1	0	0.0333333
	67	6 h	0	-	-	0
	67	12 h	0	-	-	0
	67	24 h	-	-	-	-
	68	Baseline	-	-	-	-
	68	15 min	0	0	0	0
	68	2 h	-	-	0	0
	68	6 h	-	-	-	-
	68	12 h	-	0	0.3	0.15
	68	24 h	-	-	-	-
	69	Baseline	-	-	-	-
	69	15 min	-	-	-	-
	69	2 h	-	0	-	0
	69	6 h	-	-	-	-
	69	12 h	-	-	-	-
	69	24 h	-	-	-	-
	72	Baseline	-	0.3	-	0.3
	72	15 min	-	-	-	-
	72	2 h	-	0.1	-	0.1
	72	6 h	-	-	-	-
	72	12 h	-	-	-	-
	72	24 h	0	0.3	-	0.15
	77	Baseline	0	-	0	0
	77	15 min	-	0.1	0.2	0.15
	77	2 h	-	0.4	0.5	0.45
	77	6 h	0.2	0.3	0.5	0.333333
	77	12 h	0	0.5	0	0.166667
	77	24 h	-	-	-	-
	78	Baseline	0	0.2	0	0.0666667
	78	15 min	0	0		0
	78	2 h	0			0
	78	6 h	0	0.1	0.2	0.1
	78	12 h	0	0.1	0	0.0333333
	78	24 h	0	0	0	0
	79	Baseline	-	-	-	-
	79	15 min	-	-	-	-
	79	2 h	0	0.2	0	0.0666667
	79	6 h	0	0.1	-	0.05
	79	12 h	-	0	0.2	0.1
	79	24 h	-	-	-	-
	80	Baseline	-	-	-	-
	80	15 min	0.2	0	-	0.1
Rescue	80	2 h	0.7	0.5	0.6	0.6
1h after	80	3 h	0	-	0	0
	80	6 h	0	0	0	0
	80	12 h	0.2	-	-	0.2
	80	24 h	0.4	-	-	0.4

## Sheet: Timecourse RT
FGS - REAL TIME			Scores after rescue (moment in red) were deleted
CAT #	Baseline	15 min	30 min	1 h	2 h	3 h	4 h	6 h	8 h	12 h	24 h
2	0	0.0666667	0.133333	0.5	0.666667	-	-	-	-	-	-
3	0.3	0.466667	0.308333	0.266667	0.4	0.4	0.266667	0.466667	0.333333	0.233333	0.2
4	0	0.25	0.291667	0.466667	-	-	-	-	-	-	-
7	0	0.0333333	0	0	0.283333	0.0666667	0.166667	0.0666667	0.1	0.05	0
8	0.0666667	0.333333	0.1	0.233333	0.333333	0.233333	0.3	0.0666667	0.55	0.3	0.233333
10	0.166667	0.0666667	0.266667	0.3	0.4	0.458333	0.233333	0.35	0.166667	0.1	0.133333
11	0.266667	0	0	0.233333	0.6	0.5	0.333333	0.433333	0.133333	0.108333	0.1
12	0.266667	0.291667	0.233333	0.2	0.291667	0.433333	0.0666667	0.166667	0.2	0.233333	0.3
13	0.133333	0.233333	0.2	0.1625	0.208333	0.233333	0.166667	0.15	0.366667	0.1	0.133333
14	0.333333	0.333333	-	-	-	-	-	-	-	-	-
16	0	0.2	0.266667	0.1	0.333333	0.166667	0.2	0.3	0.366667	-	-
17	0	0	0.0666667	0.1	0	0	0.133333	0	0.2	0.1	0.0333333
18	0.0333333	0.266667	0.233333	0.166667	0.133333	0.2	0.133333	0.0333333	0.233333	0.3	0
20	0.233333	0.166667	0.1	0.2	0.433333	0.6	0.866667	-	-	-	-
21	0.3	0.2	0.0416667	0.183333	0.433333	0.333333	0.333333	0.35	0.333333	0.166667	-
22	0.15	0.4	-	0.1	0.458333	0.1	0.416667	-	0.3	0.3	0.166667
23	0.2	0.4	-	-	-	-	-	-	-	-	-
24	0.466667	0.5	0.5	0.5	0.6	0.533333	0.333333	-	0.458333	0.466667	0.0666667
27	0.166667	0.4	0.1	0.133333	0.0333333	0	0.133333	0.233333	0.2	0.0333333	0.0333333
28	0.0666667	0	0.266667	0.291667	0.1	0.133333	0.241667	0.0333333	0.1	0.0666667	0.1
29	0.1	0.1	0.15	0.225	0.0666667	0	0.1	0.0666667	0.0666667	0.0666667	0.0666667
30	0.3	0.233333	0.3	0.166667	0.366667	0.2	0.466667	0.1	0.2	0.133333	0.0666667
31	0.4	0.433333	0.2	0.3	0.5	0.2	0.158333	0.233333	0.433333	0.333333	0.333333
32	0.325	0	0.2	0.191667	0.1	0.166667	0.133333	0.166667	0.2	0.1	0.238889
33	0.3	0.15	0.0333333	0.133333	0.166667	0.366667	-	-	-	-	-
34	0.166667	0.366667	0.2	0.233333	0.3	0.233333	0.166667	0.3	0.35	0.2	0.0555556
35	0.166667	0.0666667	0.0666667	0.133333	0.166667	0.1	0.283333	0.183333	0.0666667	0.333333	0.133333
36	0.266667	0.3	0.266667	0.366667	0.2	0.2	0.433333	0.166667	0.15	0.233333	0.3
37	0	0.133333	0.466667	0.7	0.0333333	0.466667	0.0666667	0.0333333	0.133333	0.133333	0.2
39	0	0	0.0666667	0.433333	0.4	0.0666667	0.133333	0.1	0.211111	0.4	0.0666667
40	0.0666667	0.3	0.0333333	0.1	0.4	0.2	0.133333	0.2	0.266667	0.166667	0.133333
41	0.166667	0.266667	0.3	0.233333	0.433333	0.133333	0.375	-	0.2	0.466667	0.4
42	0.0666667	0.0333333	0.15	-	-	-	-	-	-	-	-
43	0	0.0333333	0	0.0333333	0.133333	0.333333	0.1	-	-	-	-
45	0	0.3	0.4	0.266667	0	0.1	0.2	0	0.0666667	0.2	0.166667
46	0.05	0.0333333	0.25	0.266667	0.0666667	0	0.166667	0.0333333	0	0	0.0666667
48	0.133333	0.1	0.5	0.4	0.433333	0.233333	0.4	0.5	0.2	-	-
49	0.0333333	0	0.3	0.233333	0.166667	0.1	0.466667	0.0666667	0.541667	0.375	0.208333
50	0.333333	0.433333	0.333333	0.3	0.4	0.366667	0.533333	0.333333	0.233333	0.266667	0.288889
51	0.3	0.3	0.3	0.2	0.233333	0.466667	0.333333	0.333333	0.266667	0.5	0.333333
53	0.166667	0.433333	0.433333	0.866667	0.8	0.9	0.633333	0.8	0.566667	0.366667	0.366667
54	0.2	0.2	-	-	0	-	-	-	-	-	-
55	0	0.433333	0.383333	0.333333	0.266667	0.533333	0.366667	0.25	0.133333	0.533333	0.4
56	0.0666667	0.2	0.233333	0.5	0.5	0.333333	0.5	0.5	-	-	-
57	0.3	0.433333	0.566667	0.425	0.8	-	-	-	-	-	-
58	0.333333	0.266667	0.208333	0.333333	0.2	0.466667	0.333333	0.266667	0.2	0.3	0.3
59	0.4	0.366667	0.366667	0.4	0.2	0.3	0.266667	0.366667	0.366667	0.3875	0.35
61	0.3	0.266667	0.208333	0.433333	-	-	-	-	-	-	-
62	0.1	0.0333333	0	0	0.166667	0.0333333	0.1	0.1	0.266667	0.233333	0
63	0.1	0.1	0.2	0.133333	0.2	0.15	0.2	0.2	0.2	0.191667	0.2
64	0.3	0.225	0.0666667	0.233333	0.433333	0.4	0.433333	0.6	0.533333	0.2	0.0666667
65	0.2	0.1	0.133333	0.1	0.266667	0.4	0.266667	0.433333	0.333333	0.166667	0.266667
66	0.0666667	0	0.1	0.233333	0.4	0.366667	0.333333	0.3	0.433333	0.4	0.366667
67	0	0	0.0666667	0	0	0.266667	0.266667	0.1	0.4	0.0666667	0.15
68	0	0	0	0.0666667	0.0333333	0.3	0.15	0.0666667	0.5	0.366667	0.0666667
69	0.15	0.233333	0.4	0.3	0.233333	0.075	0.233333	0.583333	-	-	-
70	0	0	0.0666667	0	0	0	0	0	0.0333333	0	0
71	0.2	0.3	0.3	0.2	0.3	0.1	0.0333333	0.1	0.0666667	0.133333	0.0666667
72	0.233333	0.166667	0.2	0.5	0.366667	0.3	0.333333	0.133333	0.1	-	0.1
73	0.266667	0.375	0.216667	0.291667	0.25	0.2	0.266667	0.25	0.166667	0.25	0
77	0.05	0.1	0.333333	0.466667	0.4	0.1	0.133333	0.333333	0.4	0.2	0.133333
78	0.3	0.166667	0.108333	0.2	0.375	0.177778	0.1875	0.233333	0.3	0.266667	0.233333
79	0.25	0.0333333	0.05	0.1	0.233333	0.133333	0.333333	0.2	0.166667	0	0.0666667
80	0.25	0.233333	0.1	-	0.7	-	-	-	-	-	-

## Sheet: Timecourse IMG
FGS - IMAGES			Scores after rescue (moment in red) were deleted
CAT #	Baseline	15 min	2 h	6 h	12 h	24 h
2	0.1	0.05	0.633333	-	-	-
3	0.166667	0.333333	-	0.366667	0.4	0.4
4	-	-	-	-	-	-
7	-	0.25	0	0	-	-
8	-	-	0.305556	0	0.166667	-
10	-	0.1	0.35	0.2	0.3375	-
11	0	0	-	0	0	0
12	0	0	-	0	0	0
13	-	-	-	0	-	-
14	0	0.0625	-	-	-	-
16	0	0.0333333	0.333333	0.3	-	-
17	0	0	-	0.125	-	0
18	0	-	0.0333333	-	0.133333	0.25
20	-	0.266667	0.533333	-	-	-
21	0.1	-	0.4	0.1	0	-
22	-	0.433333	-	-	0.366667	0
23	0.05	0.2	-	-	-	-
24	0.266667	0.533333	0.466667	-	0.333333	0.2125
27	-	-	0.125	0.208333	0.0833333	-
28	-	0	-	0.0333333	-	-
29	-	-	-	0	-	-
30	-	-	0.1	0	0.3	0
31	0.3	0.35	0.433333	0.366667	0.2	0.2
32	0.166667	-	-	-	-	0
33	0.1	0.2	0.133333	-	-	-
34	0.166667	0.366667	0.133333	0.166667	0.2	0.075
35	-	0	0	-	-	-
36	-	-	0.3	-	-	-
37	0.3	-	0.2	-	0.266667	0.3
39	-	0.191667	0.1875	0.0416667	0	-
40	-	-	0.4	0.1	-	-
41	0.266667	0.333333	-	0.2	-	-
42	-	0.0333333	-	-	-	-
43	-	-	0.375	-	-	-
45	0.3	0.25	-	0.2	0.15	-
46	0	0	0	0	0	0
48	-	0.2	0.3	0.133333	-	-
49	0	-	0.0666667	0.0333333	0.1	0
50	0.1	0.333333	0	-	-	0
51	0.466667	0.3	-	0.266667	0.233333	0.1
53	-	-	0.6	-	-	-
55	-	-	0.0666667	0.266667	0.633333	-
56	-	0.0666667	0.466667	0.366667	-	-
59	0.0666667	0.133333	0	0.1	0.2	0.25
61	0.3	-	-	-	-	-
62	0.3	0	0.1	0.1	-	0.1
63	-	0.3	-	-	-	0.25
65	0.233333	0	0.2	0.541667	0.1	0.233333
66	0.166667	0.1	0.1	0.0333333	0.3	0.133333
67	-	-	0.0333333	0	0	-
68	-	0	0	-	0.15	-
69	-	-	0	-	-	-
72	0.3	-	0.1	-	-	0.15
77	0	0.15	0.45	0.333333	0.166667	-
78	0.0666667	0	0	0.1	0.0333333	0
79	-	-	0.0666667	0.05	0.1	-
80	-	0.1	0.6	-	-	-

## Sheet: Effect ANALGESIA
Cat #	Time of rescue	FGS RT Before	FGS RT After		FGS IMG before	FGS IMG after		Botucatu-SF Before	Botucatu-SF After
2	2h	0.63	0.33		-	-		5	3
4	1h	0.47	0.1		-	-		4	1
16	8h	0.37	0.37		0.3	0.5		4	1
20	4h	0.87	0.47		0.6	0.36		4	2
33	3h	0.37	0		0.27	0.07		5	0
42	30 min	0.15	0		0.67	0		5	1
43	4h	0.1	0.2		0.4	0.1		4	1
48	8h	0.2	0.1		0.17	0.15		5	2
56	6h	0.5	0		0.37	0.13		4	1
57	2h	0.8	0.55		-	-		4	1
61	1h	0.43	0.33		0.67	0.27		5	2
69	6h	0.58	0.13		-	-		5	0
80	2h	0.7	0.13		0.6	0		4	2

## Sheet: FGS RT - AU
FGS-RT
Time point	BASELINE	15 min	24h		BASELINE	15 min	24h		BASELINE	15 min	24h		BASELINE	15 min	24h		BASELINE	15 min	24h
CAT #	EARS	EARS	EARS		EYES	EYES	EYES		MUZZLE	MUZZLE	MUZZLE		WHISKERS	WHISKERS	WHISKERS		HEAD	HEAD	HEAD
2	0	0	0		0	0	0		0	0	1		0	0.666667	1		0	0	0
3	0	0.333333	0		1	0	0		1	2	0		1	2	2		0	0.333333	0
4	0	0	1		0	0	0		0	0	0		0	2	0		0	-	0
7	0	0	0		0	0	0		0	0	0		0	0.333333	0		0	0	0
8	0	0	0		0	0	0.666667		0	1	0.666667		0.333333	1	0		0.333333	1.33333	1
10	0	0	0		0	0	0		0.666667	0.666667	0.666667		0.333333	0	0.666667		0.666667	0	0
11	0	0	0		0.333333	0	0.333333		1	0	0		0.333333	0	0		1	0	0.666667
12	0	0	0		0	0	0		1	1	1		1	1.33333	2		0.666667	0.5	0
13	0	0	0		0	0	0		0.333333	1	0		0.666667	1	0.666667		0.333333	0.333333	0.666667
14	0	0	-		0	1	-		1.66667	1	-		-	-	-		1	0.666667	-
16	0	0	0		0	1	0		0	0.333333	0		0	0.666667	0		0	0	0
17	0	0	0		0	0	0		0	0	0		0	0	0		0	0	0.333333
18	0	0.333333	0		0	0	0		0	0.666667	0		0	1.66667	0		0.333333	0	0
20	0.666667	0	0		0.666667	0.666667	1		0	0	0		0	0	0		1	1	1
21	0	0	0		0	0	0		1	1	-		2	1	-		0	0	-
22	0	0	0		0	1.33333	0		0	1	0.666667		1.5	1	1		0	0.666667	0
23	0	0	-		0	1	-		1	2	-		1	1	-		0	0	-
24	0	0	0		1.33333	2	0		0.666667	1	0		1	1	0.333333		1.66667	1	0.333333
27	0	0	0		0	1	0		0.333333	1.33333	0		1.33333	1.66667	0.333333		0	0	0
28	0	0	0		0	0	0		0.333333	0	0.333333		0	0	0.666667		0.333333	0	0
29	0	0	0		0	0	0		0	0	0.333333		1	1	0.333333		0	0	0
30	0	0	0		0	0	0		1	1.33333	0		2	1	0.666667		0	0	0
31	0	0	0.333333		1	1	1		1	1	0		1	1	1		1	1.33333	1
32	0	0	0		0	0	0		1	0	0.666667		2	-	1.33333		0	-	0
33	0	0	0		0	0	0		1	1	0.5		2	0.5	0.5		0	0	0
34	0	0	0		0	0	0.333333		0.666667	1	0		0.333333	1	0		0.666667	1.66667	0
35	0	0	0.333333		0.333333	0	0.333333		1	0	0		0.333333	0.333333	0		0	0.333333	1
36	0	0	0		0.666667	1	1		1	1	1		1	1	1		0	0	0
37	0	0	0		0	0	0		0	0.666667	1		0	0.666667	1		0	0	0
39	0	0	0		0	0	0		0	0	0.333333		0	0	0.333333		0	0	0
40	0	0	0		0	1	0		0	1	0.666667		0.666667	1	0.666667		0	0	0
41	0	0	0.666667		0	1	0.666667		1	1	1		0.666667	0.333333	0.666667		0	0.333333	1
42	0	0	0.666667		0.666667	0.333333	1.66667		0	0	1.33333		0	0	0.333333		0	0	1
43	0	0	0		0	0.333333	1		0	0	0.333333		0	0	0.333333		0	0	1
45	0	0	0.333333		0	0	0		0	1.33333	0		0	1.66667	0.666667		0	0	0.666667
46	0	0	0		0	0	0		0	0	0.333333		0.5	0.333333	0.333333		0	0	0
48	0	0	0		0	0	0		0.333333	0.5	1		0.333333	0.5	1.33333		0.666667	0	0.666667
49	0	0	0		0	0	0		0	0	0.666667		0	0	1		0.333333	0	0.5
50	0	0	0		0.333333	0	0		1	2	1.33333		1	2	2		1	0.333333	0
51	0.666667	0	1		1	1	1		0.333333	1	0		0	0	1		1	1	0.333333
53	0.333333	0	0		0.666667	1	0.333333		0.333333	1.66667	1		0.333333	1.66667	2		0	0	0.333333
54	0	0	-		0.333333	1	-		0.666667	0.333333	-		1	0	-		0	0.666667	-
55	0	0	1		0	1	0.333333		0	1	1		0	0.666667	1		0	1.66667	0.666667
56	0	0	0		0	0	0		0	1	0		0.666667	0.666667	0		0	0.333333	0
57	0	0.666667	1		0	0.666667	1		1	1	1		2	2	1		0	0	1
58	0.333333	0	1		0	0	0		1	0	0		1	1	1		1	1.66667	1
59	0	0.666667	0		0.333333	0.666667	0		1	0.666667	1		1.66667	1	1.5		1	0.666667	1
61	0	0.666667	1		0	1	0.333333		1	0	0		2	0	0		0	1	0.333333
62	0	0	0		0	0	0		1	0	0		0	0	0		0	0.333333	0
63	0	0	0		0	0	0		0.333333	0	1		0.666667	1	1		0	0	0
64	0	0	0		1.5	1	0.333333		0	0	0		0.5	0.5	0		1	1	0.333333
65	0.666667	0	1		0.333333	0	0		0	0	0.333333		0	0	0.333333		1	1	1
66	0	0	0		0	0	1		0.333333	0	1		0.333333	0	1		0	0	0.666667
67	0	0	0		0	0	0		0	0	0.5		0	0	1		0	0	0
68	0	0	0		0	0	0.333333		0	0	0.333333		0	0	0		0	0	0
69	0	0	0		0	1	0		0.5	0.666667	0		1	0.666667	0		0	0	0
70	0	0	0		0	0	0		0	0	0		0	0	0		0	0	0
71	0	0	0		0	1	0		1	1	0.333333		1	1	0.333333		0	0	0
72	0.333333	0.333333	0		0	0	0		1	0.333333	0.333333		0.333333	0	0.333333		0.666667	1	0.333333
73	0	0	0		0	0	0		1	1	0		1.66667	2	0		0	-	0
77	0	0.666667	1		0	0.333333	0		0	0	0.333333		0.5	0	0		0	0	0
78	0	0	0		0	0	0		1	0.333333	0.666667		2	1	1.66667		0	0.333333	0
79	0	0	0		0	0	0		1	0.333333	0.333333		1.5	0	0		0	0	0.333333
80	0	0	0		0.5	0	1		0.5	0.666667	1		1.5	1.33333	0.333333		0	0.333333	1

## Sheet: FGS IMG - AU
FGS-IMG
Time point	BASELINE	15 min	24h		BASELINE	15 min	24h		BASELINE	15 min	24h		BASELINE	15 min	24h		BASELINE	15 min	24h
CAT#	EARS	EARS	EARS		EYES	EYES	EYES		MUZZLE	MUZZLE	MUZZLE		WHISKERS	WHISKERS	WHISKERS		HEAD	HEAD	HEAD
2	1	0	0.333333		0	0	0		0	0	0		0	0.5	1		0	0	0.333333
3	0.666667	0	0		0.666667	0	0		0.333333	1.33333	2		0	1.5	2		0	0	0
11	0	0	0		0	0	0		0	0	0		0	0	0		0	0	0
12	0	0	0		0	0	0		0	0.333333	0		0	0.333333	0		0	0	0.333333
14	0	0	-		0	0	-		0	0.5	-		-	-	-		0	0	-
16	0	0	0		0	0	0		0	0.333333	0.333333		0	0	0		0	0	1
17	0	0	0		0	0	0		0	0	0		-	0	-		0	0	0
18	0	-	0		0	-	0		0	-	1.5		0	-	1		0	-	0
21	0	-	-		0	-	-		0	-	-		1	-	-		0	-	-
23	0	0	-		0	0.666667	-		0.5	0.666667	-		0	0.666667	-		0	0	-
24	0	0	0		0.666667	2	0		0.666667	1.33333	1		0.333333	1	1		1	1	0.5
31	0	0.5	0		0.666667	1	0		1	1	1		0.333333	0	0		1	1	1
33	0	0	0.5		0	0	1		0.5	1	0.5		0.5	1	1		0	0	0
34	0	0	0.333333		0	0	0		0.666667	1	0		0	1	0		1	1.66667	0.333333
37	0	-	0		0	-	0		1	-	1		2	-	2		0	-	0
41	0	0	-		0	0.333333	-		1.33333	1	-		1	0.666667	-		0.333333	1.33333	-
45	1	0	-		0	0.166667	-		1	1	-		1	0.833333	-		0	0.666667	-
46	0	0	0		0	0	0		0	0	0		0	0	0		0	0	0
49	0	-	0		0	-	0		0	-	1		0	-	0.5		0	-	0
50	0.333333	0	0		0.333333	0	0		0	1.66667	0		0.333333	1.66667	0.5		0	0	0
51	1	0.333333	-		1.33333	1	-		0.666667	1	-		0.666667	0	-		1	0.666667	-
59	0.333333	0	0.333333		0	0.666667	0		0.333333	0	1		0	0	0.666667		0	0.666667	1
62	0	0	0		0	0	0		1	0	1		1	0	0		1	0	0
65	1	0	0.666667		0.333333	0	0		0.333333	0	0.666667		0	0	0.666667		0.666667	0	0.333333
66	0.333333	1	0		0.333333	0	0		0.666667	0	0.666667		0.333333	0	0.666667		0	0	0
72	0	-	0		0	-	0		1	-	0.5		2	-	1		0	-	0
77	0	0.5	-		0	0.5	-		0	0.5	-		0	0	-		0	0	-
78	0.333333	0	0		0	0	0		0.333333	0	0		0	0	0		0	0	0
